# Supplementary material
Source: Springer Nature journal article supplement (http://www.springermedizin.de/resource/supplementary/12958_2009_581_MOESM1_ESM.pdf/9568024)

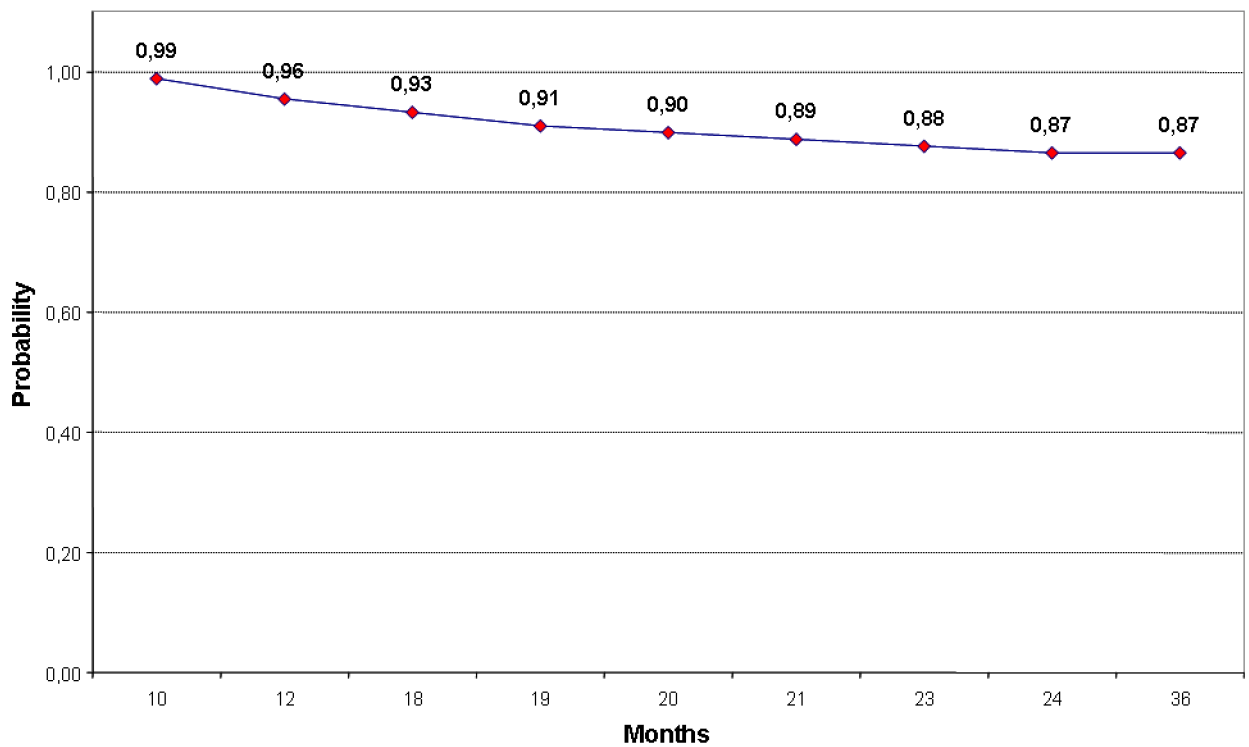

Supplement: MOESM1 [file 9568024]
